# Supplementary material for: Deprotonation of the –NH proton from a pyrrole moiety enables concentration-dependent colorimetric and fluorescence quenching of silver(i) ions
Source: Royal Society of Chemistry journal article supplement (doi:10.1039/d4nj04758c), 2025-01-01
Supplement: d4nj04758c1.pdf [file d4nj04758c1.pdf]

## Electronic Supplementary Information

# Deprotonation of –NH Proton from Pyrrole Moiety Enables Concentration Dependent Colorimetric and Fluorescence Quenching of Silver (I) ions

Dhakshinamurthy Divya<sup>a,b</sup>, Manivannan Nandhagopal<sup>c</sup>, Sathiah Thennarasu<sup>b\*</sup>

<sup>a</sup> Vel Tech Rangarajan Dr. Sagunthala R&D Institute of Science and Technology, Avadi, Chennai 600062, Tamil Nadu, India.

<sup>b</sup> Organic and Bioorganic Chemistry Laboratory, CSIR – Central Leather Research Institute, Adyar, Chennai 600020, Tamil Nadu, India.

<sup>c</sup> Saveetha Medical College and Hospital, Institute of Medical and Technical Science, Thandalam, Chennai 602105, Tamil Nadu, India.

\*Corresponding author: Prof. Sathiah Thennarasu (E-mail: [thennarasu@gmail.com](mailto:thennarasu@gmail.com))

| Figure No | Content                                                                                                                                                                                                                | Page No |
|-----------|------------------------------------------------------------------------------------------------------------------------------------------------------------------------------------------------------------------------|---------|
| S1        | <sup>1</sup> H NMR spectra of ligand (1) in CDCl <sub>3</sub> .                                                                                                                                                        | S2      |
| S2        | <sup>13</sup> C NMR spectra of ligand (1) in CDCl <sub>3</sub> .                                                                                                                                                       | S2      |
| S3        | HRMS spectra of ligand (1) in CH <sub>3</sub> CN.                                                                                                                                                                      | S3      |
| S4        | Steady state fluorescence of ligand (1) and its spiked samples containing biological sample.                                                                                                                           | S3      |
| S5        | Steady state fluorescence of ligand (1) and its spiked samples containing environmental sample.                                                                                                                        | S4      |
| S6        | Steady state fluorescence of ligand (1) and its spiked samples containing industrial sample.                                                                                                                           | S4      |
| S7        | Fluorescence emission response of 1 with successive additions of Ag <sup>+</sup> and EDTA.                                                                                                                             | S5      |
| S8        | Ligand (1)-coated silica plates as a tool for <i>point-of-care-testing</i> devices prompting naked-eye detection showing the color change in the ligand (1) upon interaction with Ag <sup>+</sup> ions under sunlight. | S5      |
| Table S1  | Comparison of LOD, K <sub>a</sub> , Stoichiometry and applications of ligand (1) with similar data reported for other chemosensors.                                                                                    | S5      |
|           | References                                                                                                                                                                                                             | S6      |

## Electronic Supplementary Information

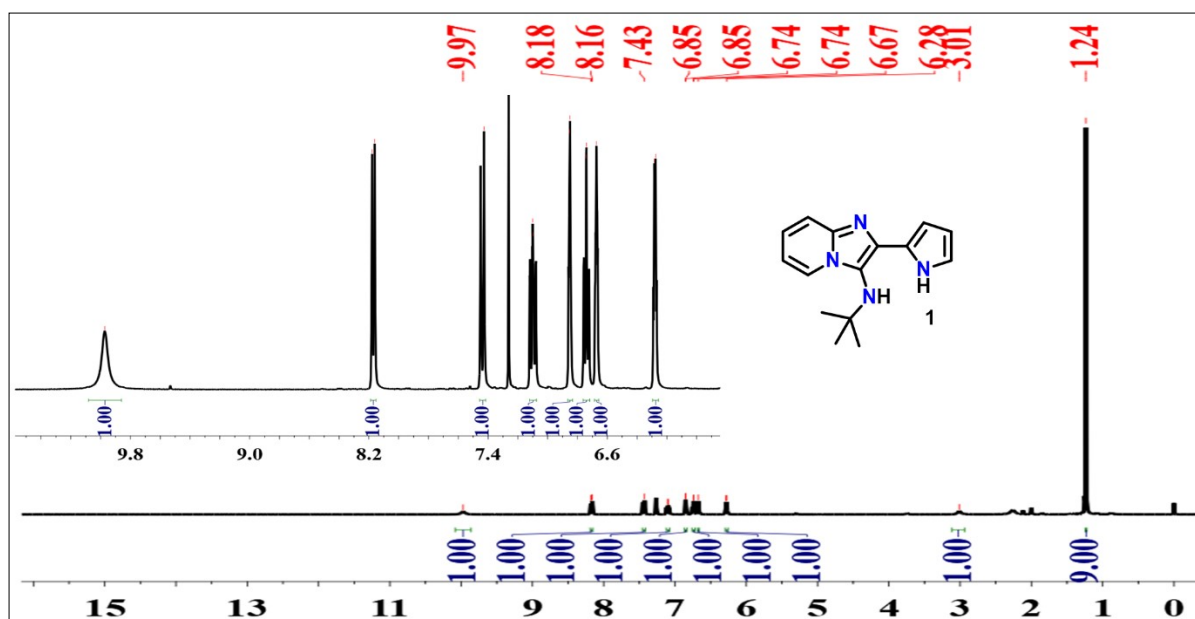

**Figure S1.**  $^1\text{H}$  NMR spectra of ligand (**1**) in  $\text{CDCl}_3$ .

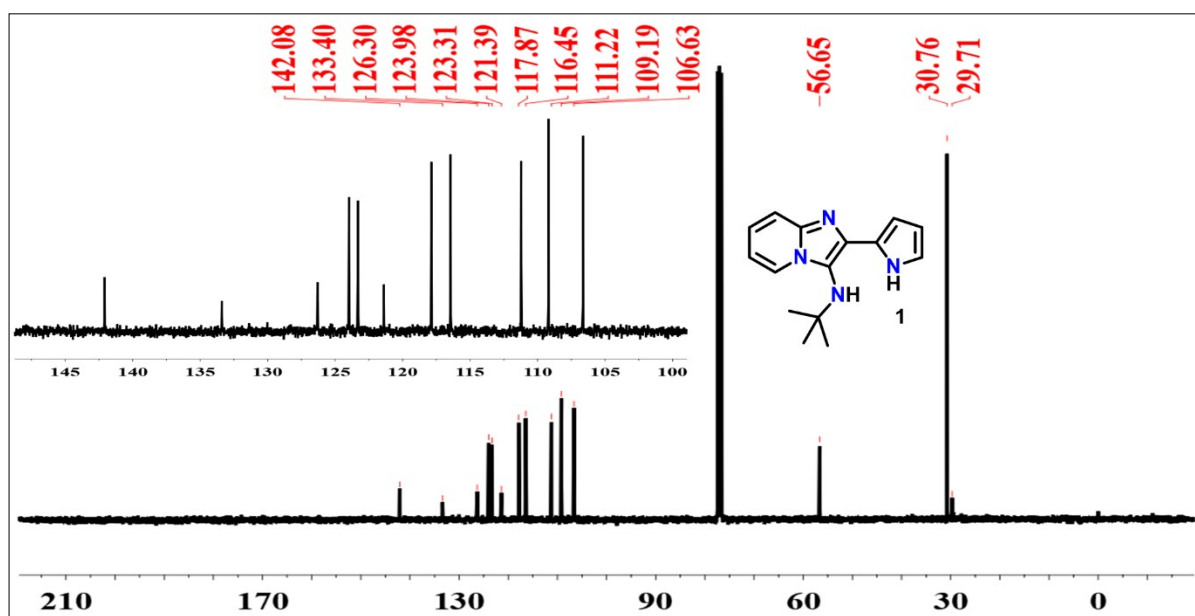

**Figure S2.**  $^{13}\text{C}$  NMR spectra of ligand (**1**) in  $\text{CDCl}_3$ .

## Electronic Supplementary Information

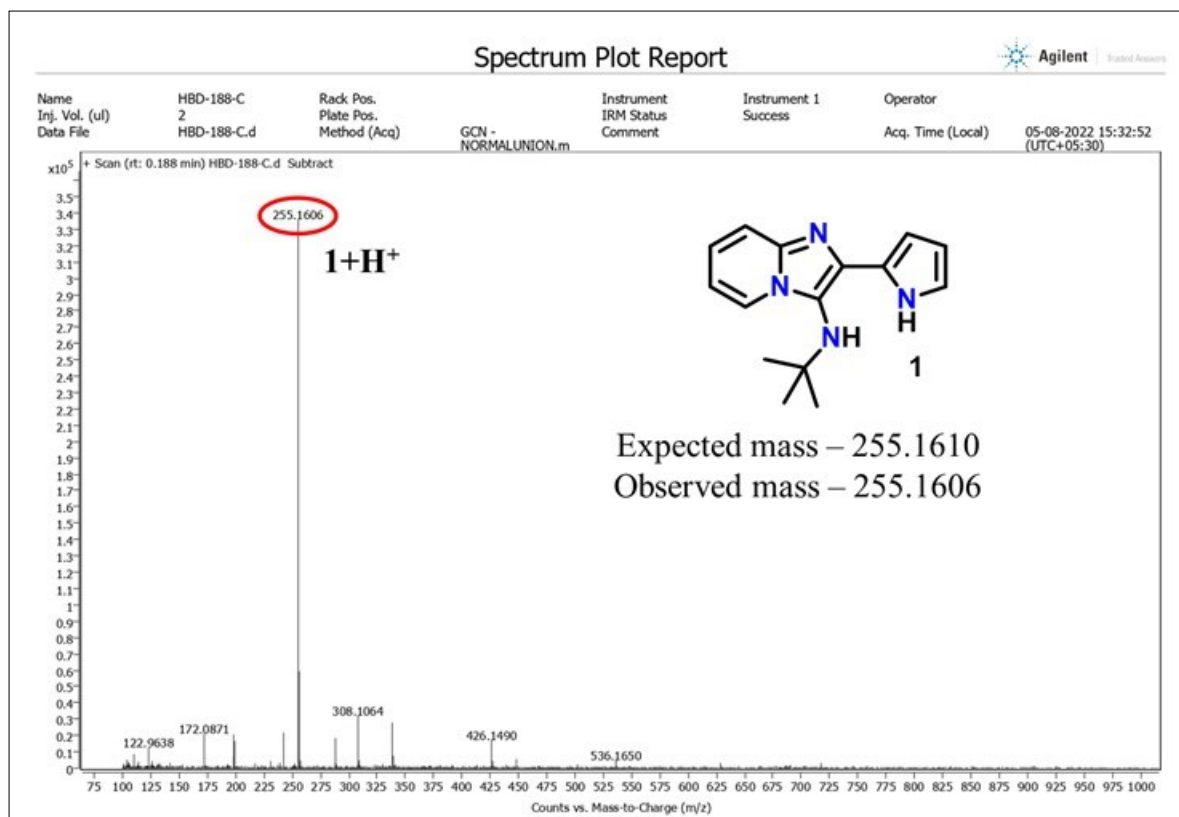

**Figure S3.** HRMS spectra of ligand (1) in CH<sub>3</sub>CN.

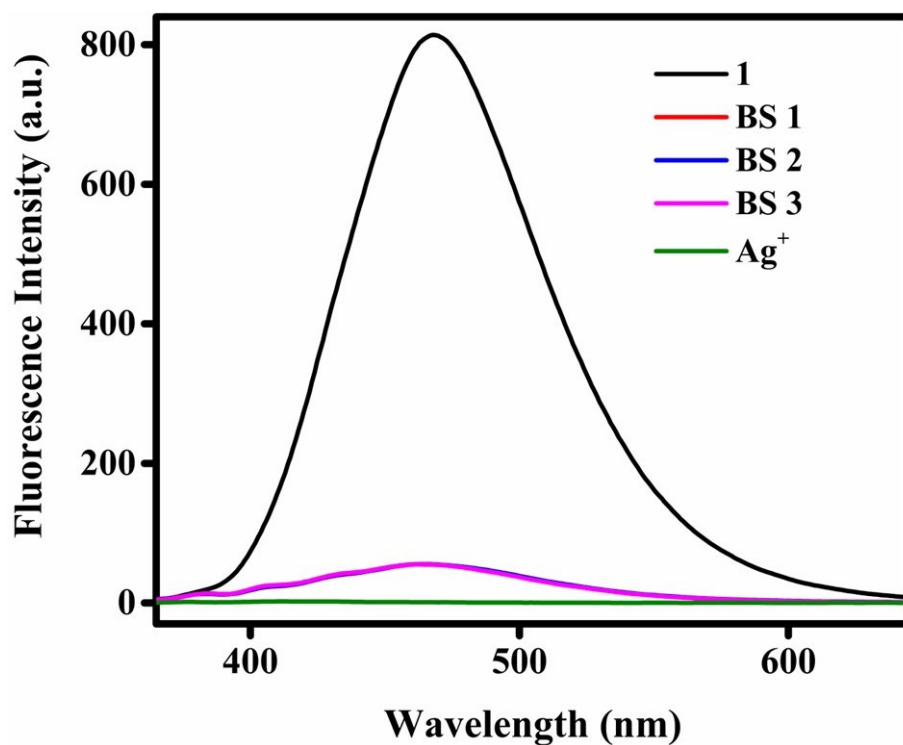

**Figure S4** Steady state fluorescence of ligand (1) 5.07  $\mu$ M and its spiked samples containing biological sample (BS).

### Electronic Supplementary Information

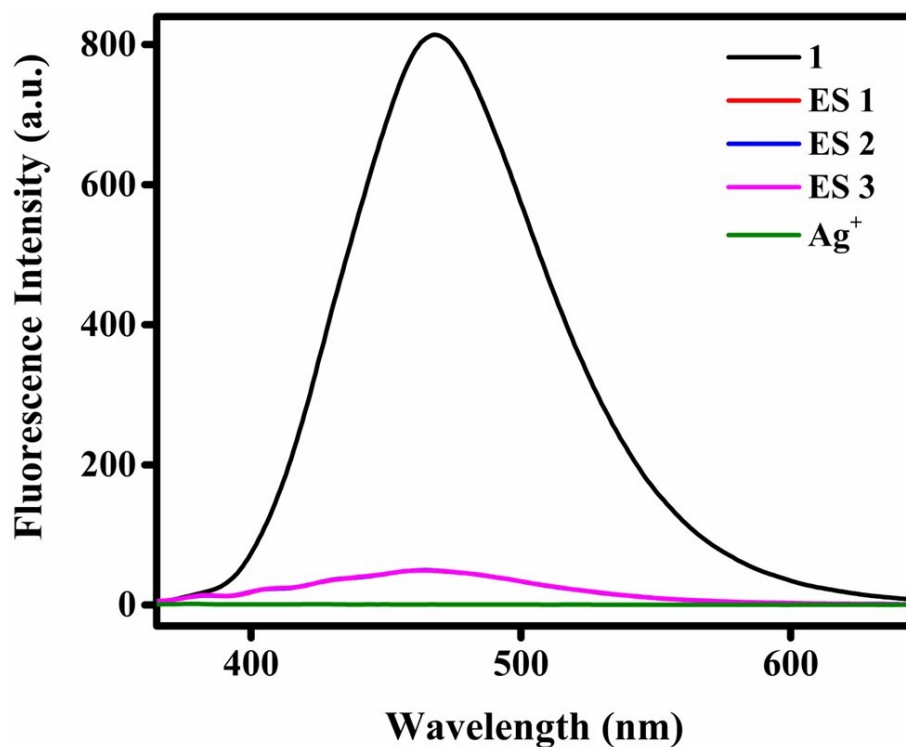

**Figure S5:** Steady state fluorescence of ligand (1) 5.07 μM and its spiked samples containing environmental sample (ES).

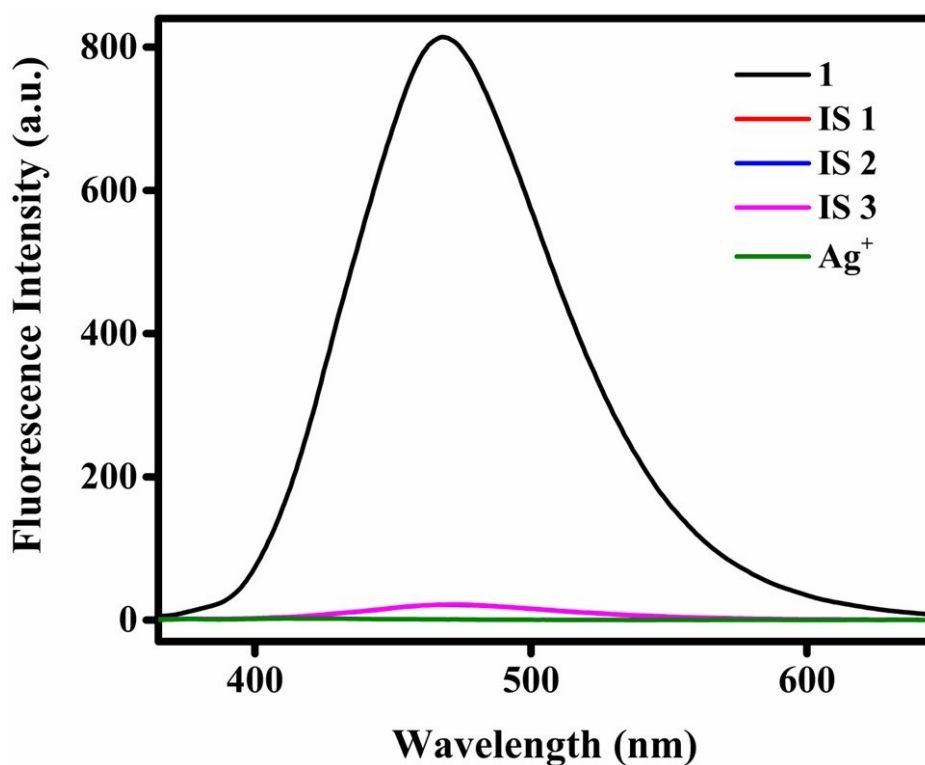

**Figure S6:** Steady state fluorescence of ligand (1) 5.07 μM and its spiked samples containing industrial sample (IS).

## Electronic Supplementary Information

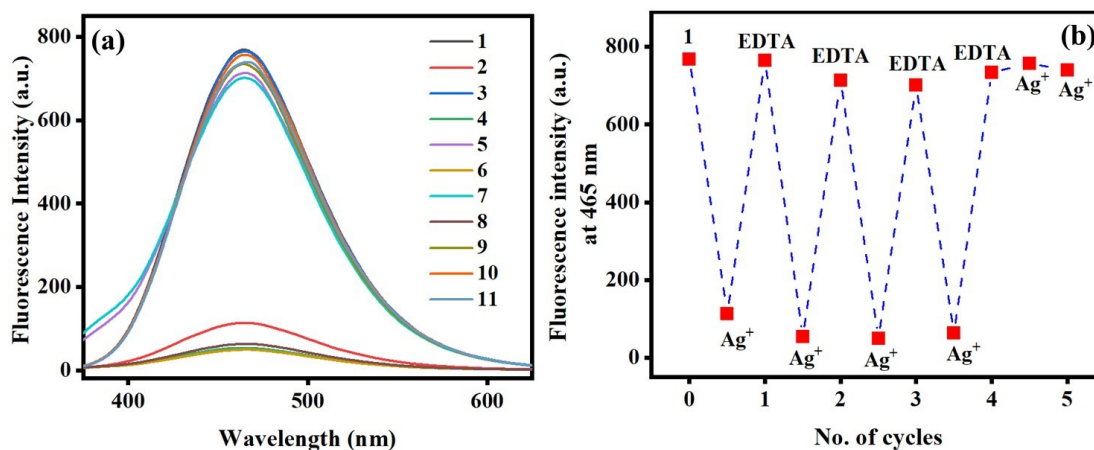

**Figure S7:** Fluorescence emission response of **1** with successive additions of Ag<sup>+</sup> and EDTA.

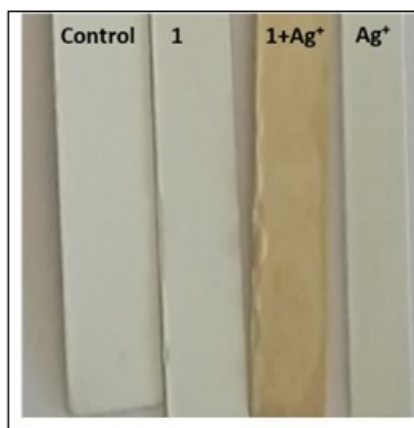

**Figure S8:** Ligand (**1**)-coated silica plates as a tool for *point-of-care-testing* devices prompting naked-eye detection showing the color change in the ligand (**1**) upon interaction with Ag<sup>+</sup> ions under sunlight.

**Table S1:** Comparison of limit of detection, binding constant, stoichiometry, and applications of ligand (**1**) with similar data reported for other chemosensors.

| Name                                    | 1/2 | LOD     | K <sub>a</sub> | Stoichiometry<br>Ligand:metal | Applications                                         |
|-----------------------------------------|-----|---------|----------------|-------------------------------|------------------------------------------------------|
| 1-Benzylidenethiosemicarbazide          | 2   | 0.2 μM  |                | 1:1                           | Water samples [1]                                    |
| Thiosemicarbazide                       | 2   | 6.13 nM |                | 1:2                           | Test strips, Water samples, Imaging MCF7 cells [2]   |
| Isocyanate naphthalene based derivative | 2   | 2.87 nM |                | 1:2                           | Real sample analysis, Test strips and Bioimaging [3] |

## Electronic Supplementary Information

|                                                         |   |                              |                                   |     |                                                                                        |
|---------------------------------------------------------|---|------------------------------|-----------------------------------|-----|----------------------------------------------------------------------------------------|
| Semicarbazone based Schiff base                         | 2 | 7.7 $\mu\text{M}$            |                                   |     | Water samples [4]                                                                      |
| Thiosemicarbazone based Schiff base                     | 1 | 2.2 $\mu\text{M}$            | $2.8 \times 10^9 \text{ M}^2$     | 1:2 | Real sample analysis [5]                                                               |
|                                                         | 2 | 1.6 $\mu\text{M}$            |                                   |     |                                                                                        |
| Carbazole-Rhodanine based derivative                    | 2 | 12.8 nM                      | $3.8 \times 10^4 \text{ M}^{-1}$  | 1:1 | Imaging HeLa cells [6]                                                                 |
| Octapamine based Schiff base                            | 2 | 1.49 $\mu\text{M}$           | $7.00 \times 10^4$                | 1:1 | NR [7]                                                                                 |
| Thiourea derivative                                     | 2 | $8 \times 10^{-7} \text{ M}$ | $1.8 \times 10^8 \text{ M}^{-2}$  | 1:2 | NR [8]                                                                                 |
| p-aminobenzoic acid and p-aminophenol based carbon dots | 2 | 1.4 $\mu\text{M}$            | NR                                | NR  | Real sample analysis [9]                                                               |
| <b>1</b>                                                | 1 | 3.08 nM                      | $1.73 \times 10^6 \text{ M}^{-1}$ | 2:1 | Test strips, water analysis, and imaging of onion epidermal cells ( <b>this work</b> ) |
|                                                         | 2 | 0.57 nM                      | $1.73 \times 10^6 \text{ M}^{-1}$ |     |                                                                                        |

1=UV and 2=fluorescence method, NR=not reported

### References

- [1] Z. Hejrian Nezhad, A. Bazmandegan-Shamili, S. Saeednia, M. Rohani Moghadam, Novel Fluorescent Determination of Silver Ion in Water Samples Using the Schiff Base 1-Benzylidenethiosemicarbazide, *Anal Lett* (2024) 1–11. <https://doi.org/10.1080/00032719.2024.2318652>.
- [2] K.B. Hiremath, M. Shivashankar, A selective fluorescence chemosensor: Thiosemicarbazide Schiff base derivative for detection of  $\text{Ag}^+$  ions in living cells, *J Mol Struct* 1302 (2024) 137490. <https://doi.org/10.1016/j.molstruc.2024.137490>.
- [3] T. Johnny Dathees, G. Narmatha, G. Prabakaran, S. Abisha Nancy, A. Abiram, A.I. Almansour, R. Suresh Kumar, A. Thangamani, R. Nandhakumar, Dipodal unsymmetrical diaryl conjugated naphthalene: A fluorescent chemosensor for silver ions and its practical applications, *J Photochem Photobiol A Chem* 458 (2025) 115986. <https://doi.org/10.1016/j.jphotochem.2024.115986>.
- [4] P. Sharma, M. Ganguly, A. Doi, Complexation–reduction method for the evolution of nanoparticles to detect  $\text{Ag}^+$  and  $\text{Cu}^{2+}$ : a synergistic approach, *Appl Nanosci* 14 (2024) 739–751. <https://doi.org/10.1007/s13204-024-03042-1>.
- [5] M. Sahu, A. Kumar Manna, K. Rout, J. Mondal, G.K. Patra, A highly selective thiosemicarbazone based Schiff base chemosensor for colorimetric detection of  $\text{Cu}^{2+}$

## Electronic Supplementary Information

- and Ag<sup>+</sup> ions and turn-on fluorometric detection of Ag<sup>+</sup> ions, *Inorganica Chim Acta* 508 (2020) 119633. <https://doi.org/10.1016/J.ICA.2020.119633>.
- [6] D.B. Christopher Leslee, S. Karuppannan, M.V. Karmegam, S. Gandhi, S. Subramanian, A Fluorescent Turn-On Carbazole-Rhodanine Based Sensor for Detection of Ag<sup>+</sup> Ions and Application in Ag<sup>+</sup> Ions Imaging in Cancer Cells, *J Fluoresc* 29 (2019) 75–89. <https://doi.org/10.1007/S10895-018-2312-6/METRICS>.
- [7] J.H. Kang, J.B. Chae, C. Kim, A multi-functional chemosensor for highly selective ratiometric fluorescent detection of silver(I) ion and dual turn-on fluorescent and colorimetric detection of sulfide, *R Soc Open Sci* 5 (2018). <https://doi.org/10.1098/RSOS.180293>.
- [8] H. Mu, R. Gong, L. Ren, C. Zhong, Y. Sun, E. Fu, An intramolecular charge transfer fluorescent probe: Synthesis and selective fluorescent sensing of Ag<sup>+</sup>, *Spectrochim Acta A Mol Biomol Spectrosc* 70 (2008) 923–928. <https://doi.org/10.1016/J.SAA.2007.10.006>.
- [9] Y. Ma, W. Lv, Y. Chen, M. Na, J. Liu, Y. Han, S. Ma, X. Chen, Facile preparation of orange-emissive carbon dots for the highly selective detection of silver ions, *New Journal of Chemistry* 43 (2019) 5070–5076. <https://doi.org/10.1039/C8NJ06109B>.
